# Supplementary material
Source: PubMed Central journal article supplement (PMC5726979)
Supplement: NIHMS922084-supplement-supplement_1.pdf [file NIHMS922084-supplement-supplement_1.pdf]

The RE cells were also modeled as a single compartment neuron:

$$\frac{dV_D}{dt} = -I^{K-leak} - I^{leak} - I^{Na} - I^K - I^{LCa} - I^h - I^{syn}. \quad (C.4)$$

The conductances for leak currents were  $I^{leak}$ : 0.05 mS/cm<sup>2</sup> and  $I^{K-leak}$ : 0.016 mS/cm<sup>2</sup>. The maximal conductances for other currents were fast Na<sup>+</sup> ( $I^{Na}$ ) current: 100 mS/cm<sup>2</sup>; fast K<sup>+</sup> ( $I^K$ ) current: 10 mS/cm<sup>2</sup>; and low-threshold Ca<sup>2+</sup> ( $I^{LCa}$ ) current: 2.2 mS/cm<sup>2</sup>.

**C.2 Synaptic Currents.** GABA-A, NMDA and AMPA synaptic currents were described by first-order activation schemes (Timofeev, Grenier, Bazhenov, Sejnowski, & Steriade, 2000). The equations for all synaptic currents used in this model are given in our previous publications (Bazhenov et al., 2002; Chen et al., 2012). We mention only the relevant equations:

$$\begin{aligned} I_{syn}^{AMPA} &= g_{syn}[O](V - E_{AMPA}), \\ I_{syn}^{NMDA} &= g_{syn}[O](V - E_{NMDA}), \\ I_{syn}^{GABA} &= g_{syn}[O](V - E_{GABA}). \end{aligned} \quad (C.5)$$

## Appendix D: Supplementary Figures

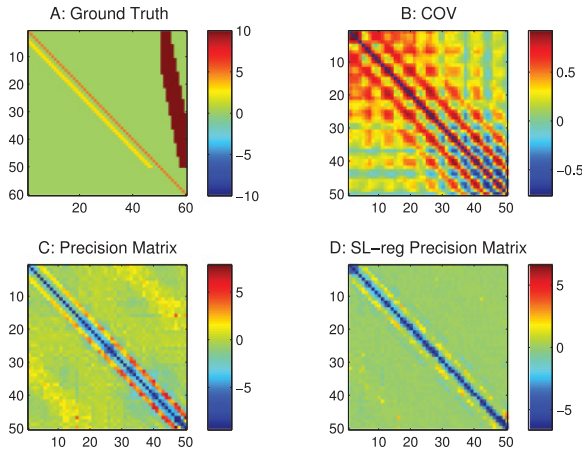

Figure 17: Passive neuron model with 5 ms fixed synaptic delay. Results from correlation-based methods. (A) Ground-truth connection matrix. Neurons 1–50 are visible neurons. Neurons 51–60 are invisible neurons. (B) Estimation from the correlation method. (C) Estimation from the precision matrix. (D) Sparse + latent regularized precision matrix.

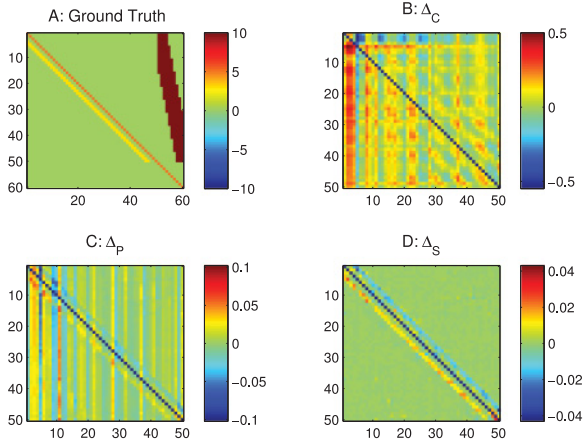

Figure 18: Differential covariance analysis of the passive neuron model with 5 ms fixed synaptic delay. The color in panels B, C, and D indicates the direction of the connections. For element  $A_{ij}$ , a warm color indicates  $i$  is the sink and  $j$  is the source:  $i \leftarrow j$ . A cool color indicates  $j$  is the sink and  $i$  is the source:  $i \rightarrow j$ . (A) Ground-truth connection matrix. (B) Estimation from the differential covariance method. (C) Estimation from the partial differential covariance method. (D) Estimation from the sparse + latent regularized partial differential covariance method.

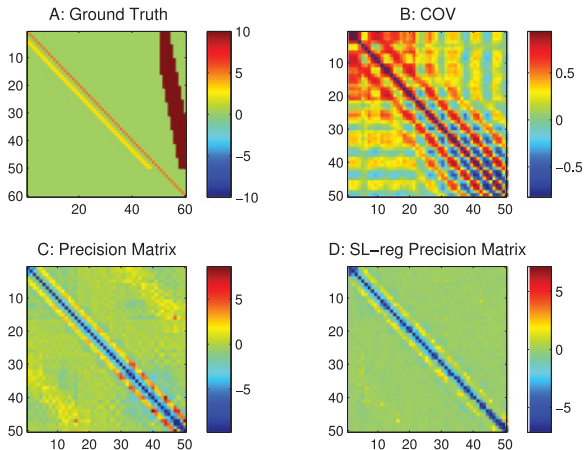

Figure 19: Passive neuron model with 0–10 ms uniformly distributed synaptic delay. Results from correlation-based methods. (A) Ground-truth connection matrix. Neurons 1–50 are visible neurons. Neurons 51–60 are invisible neurons. (B) Estimation from the correlation method. (C) Estimation from the precision matrix. (D) Sparse + latent regularized precision matrix.

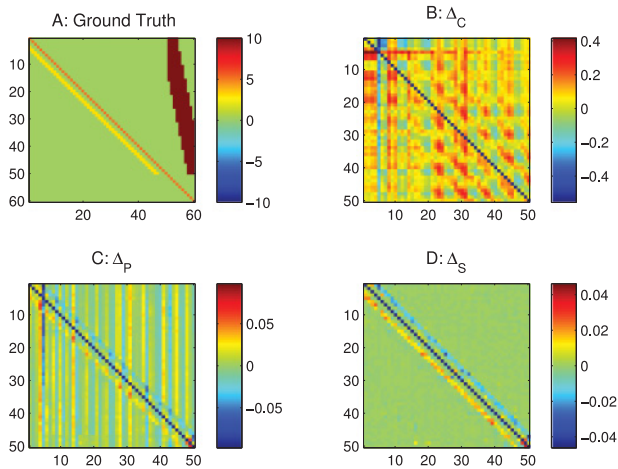

Figure 20: Differential covariance analysis of the passive neuron model with 0–10 ms uniformly distributed synaptic delay. The color in panels B, C, and D indicates the direction of the connections. For element  $A_{ij}$ , a warm color indicates  $j$  is the sink and  $i$  is the source:  $i \rightarrow j$ . A cool color indicates  $j$  is the sink and  $i$  is the source:  $i \leftarrow j$ . (A) Ground-truth connection matrix. (B) Estimation from the differential covariance method. (C) Estimation from the partial differential covariance method. (D) Estimation from the sparse + latent regularized partial differential covariance method.

## Acknowledgments

---

We thank Thomas Liu, and all members of the Computational Neurobiology Lab for providing helpful feedback. This research is supported by ONR MURI (N000141310672), the Office of Naval Research, MURI N00014-13-1-0205, the Swartz Foundation, and the Howard Hughes Medical Institute.

## References

---

- Banerjee, O., Ghaoui, L. E., d’Aspremont, A., & Natsoulis, G. (2006). Convex optimization techniques for fitting sparse gaussian graphical models. In *Proceedings of the 23rd International Conference on Machine Learning* (pp. 89–96). New York: ACM.
- Battistin, C., Hertz, J., Tyrcha, J., & Roudi, Y. (2015). Belief propagation and replicas for inference and learning in a kinetic Ising model with hidden spins. *Journal of Statistical Mechanics: Theory and Experiment*, 2015(5), P05021.
